# Supplementary material for: Preparation and morphology-dependent wettability of porous alumina membranes
Source: PubMed Central journal article supplement (PMC6009415; doi:10.3762/bjnano.9.135), 2018-05-15
Supplement: Beilstein_J_Nanotechnol-09-1423-s001.pdf [file Beilstein_J_Nanotechnol-09-1423-s001.pdf]

Supporting Information  
for  
**Preparation and morphology-dependent wettability of porous  
alumina membranes**

Dmitry L. Shimanovich<sup>1</sup>, Alla I. Vorobjova<sup>\*1</sup>, Daria I. Tishkevich<sup>2</sup>, Alex V. Trukhanov<sup>2</sup>, Maxim V. Zdorovets<sup>3,4,5</sup>, and Artem L. Kozlovskiy<sup>3,4</sup>

Address: <sup>1</sup>Belarusian State University of Informatics and Radioelectronics, P. Brovki 6, Minsk 220013, Belarus, <sup>2</sup>Scientific and Practical Materials Research Center, Institute of Semiconductor and Solid State Physics, National Academy of Sciences of Belarus, P. Brovki 19, Minsk 220072, Belarus, <sup>3</sup>L. N. Gumilyov Eurasian National University, Abylaykhan, 2/1, Astana 010008, Kazakhstan, <sup>4</sup>The Institute of Nuclear Physics of Republic of Kazakhstan, Ibragimova 1, Almaty 050032, Kazakhstan, and <sup>5</sup>Ural Federal University, Mira 19, Yekaterinburg 620002, Russia

\* Corresponding author

Email: Alla I. Vorobjova - [vorobjova@bsuir.by](mailto:vorobjova@bsuir.by)

**Additional experimental data**

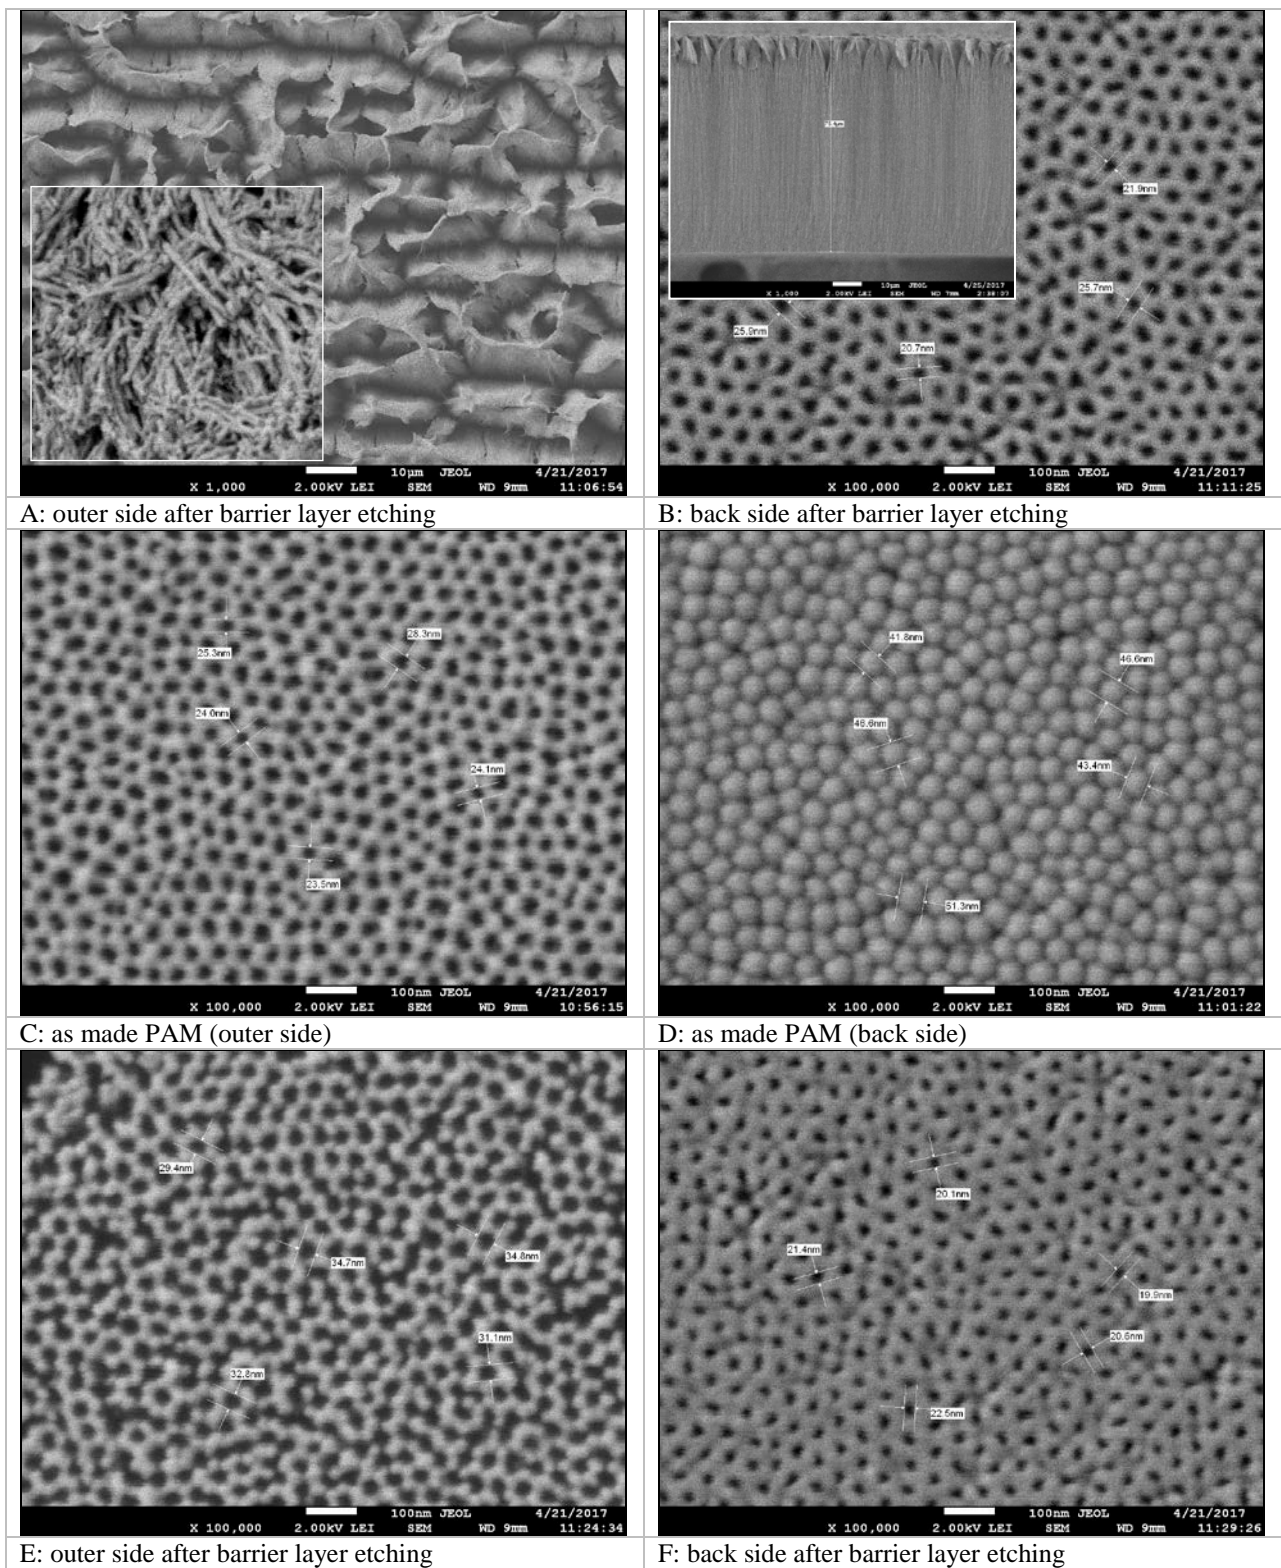

**Figure S1:** SEM images of PAM (III) with size of  $70 \times 70$  mm of  $75 \mu\text{m}$  thickness before and after barrier layer etching.
